# Supplementary material for: High-flow nasal cannula therapy for hypoxemic respiratory failure in patients with COVID-19
Source: Research Square preprint supplement (doi:10.21203/rs.3.rs-466888/v1), 2021-05-06
Supplement: Supplementary file 1 [file a5ff617a63628da98dc4b1b1.docx]

**Online Resource 3.** Disease severity risk markers at admission and at start of HFNC

|  | **Total**  ***N* =378** | **Only HFNC**  ***n* = 270** | **HFNC + IMV**  ***n* = 108** | ***p*-value** |
| --- | --- | --- | --- | --- |
| **At admission** |  |  |  |  |
| **Absolute lymphocytes–count** |  |  |  |  |
| ≥800 | 186 (51.4) | 141 (54.4) | 45 (43.7) | <0.01 |
| 400–<800 | 142 (39.2) | 101 (39.0) | 41 (39.8) | <0.01 |
| <400 | 34 (9.4) | 17 (6.6) | 17 (16.5) | <0.01 |
| **D-dimer (ng/mL)** |  |  |  |  |
| Normal | 179 (50.1) | 127 (50.0) | 52 (50.5) | 0.42 |
| 500–1000 | 105 (29.4) | 70 (27.6) | 35 (34.0) | 0.42 |
| >1000–1500 | 34 (9.5) | 26 (10.2) | 8 (7.8) | 0.42 |
| >1500 | 39 (10.9) | 31(12.2) | 8 (7.8) | 0.42 |
| **Ferritin (µg/L)** |  |  |  |  |
| High (>336.2 µg/L) | 176 (63.1) | 123 (64.4) | 53 (60.2) | 0.50 |
| **At HFNC start** |  |  |  |  |
| **Absolute lymphocytes–count** |  |  |  |  |
| ≥800 | 197 (54.0) | 159 (60.9) | 38 (36.5) | <0.0001 |
| 400–<800 | 134 (36.7) | 86 (33) | 48 (46.2) | <0.0001 |
| <400 | 34 (9.3) | 16 (6.1) | 18 (17.3) | <0.0001 |
| **D-dimer (ng/mL)** |  |  |  |  |
| Normal | 168 (46.3) | 135 (52.1) | 33 (31.7) | <0.01 |
| 500–1000 | 110 (30.3) | 73 (28.2) | 37 (35.6) | <0.01 |
| >1000–1500 | 40 (11.0) | 27 (10.4) | 13 (12.5) | <0.01 |
| >1500 | 45 (12.4) | 24 (9.3) | 21 (20.2) | <0.01 |
| **Ferritin (µg/L)** |  |  |  |  |
| High (>336.2 µg/L) | 219 (65.0) | 150 (63.6) | 69 (68.3) | 0.40 |

Data are presented as *n* (%)

HFNC, high-flow nasal cannula; IMV, invasive mechanical ventilation
